# Supplementary material for: Risk of Respiratory Infectious Diseases and the Role of Methylphenidate in Children with Attention-Deficit/Hyperactivity Disorder: A Population-Based Cohort Study
Source: MDPI journal article supplement (doi:10.3390/ijerph18115824), 2021-05-28
Supplement: s1 [file s1]

## Supplementary

**Table S1.** Reference ICD9/10 code of all respiratory infection.

| icd-10                      |                             |           | icd-9                       |                             |           |
|-----------------------------|-----------------------------|-----------|-----------------------------|-----------------------------|-----------|
| Upper Respiratory Infection | Lower Respiratory Infection | Influenza | Upper Respiratory Infection | Lower Respiratory Infection | Influenza |
| 460                         | 466                         | 487       | J00                         | J20                         | J00       |
| 461                         | 480                         | 488       | J01                         | J21                         | J01       |
| 462                         | 481                         |           | J02                         | J22                         | J02       |
| 463                         | 482                         |           | J03                         |                             | J03       |
| 464                         | 483                         |           | J04                         |                             | J04       |
| 465                         | 484                         |           | J05                         |                             | J05       |
|                             | 485                         |           | J06                         |                             | J06       |
|                             | 486                         |           |                             |                             | J09       |
|                             | 490                         |           |                             |                             | J10       |
|                             |                             |           |                             |                             | J11       |
|                             |                             |           |                             |                             | J12       |
|                             |                             |           |                             |                             | J13       |
|                             |                             |           |                             |                             | J14       |
|                             |                             |           |                             |                             | J15       |
|                             |                             |           |                             |                             | J16       |
|                             |                             |           |                             |                             | J17       |
|                             |                             |           |                             |                             | J18       |
|                             |                             |           |                             |                             | J20       |
|                             |                             |           |                             |                             | J21       |
|                             |                             |           |                             |                             | J22       |
